# Supplementary material for: Comprehensive Forced Degradation Study Revealing Diverse Chemical and Physical Degradation Pathways of AAV8
Source: Research Square preprint supplement (doi:10.21203/rs.3.rs-7596388/v1), 2025-10-09
Supplement: Supplementary file 1 [file 2d3922445d3b3ad0f46a3011.xlsx]

## Sheet: Supplemental Table 3
	Site	Peptide Sequence	Thermal Stress
			T0	40°C	45°C
Asparagine Deamidation	N57	YLGPFNGLDK	0.184	0.496	0.824
	N66	GEPVNAADAAALEHDK	0.005	0.033	0.087
	N94	YNHADAEFQER	0.023	0.206	0.562
	N113	LQEDTSFGGNLGR	0.001	0.012	0.041
	N263	QISNGTSGGATNDNTYFGYSTPWGYFDFNR	0.138	0.348	0.534
	N329	EVTQNEGTK	0.006	0.034	0.071
	N514	YHLNGR	0.068	0.073	0.077
	N540	FFPSNGILIFGK	0.023	0.028	0.034
Aspartic Acid Isomerization	D4	A[+42]ADGYLPDWLEDNLSEGIR	0.032	0.24	0.434
	D69	GEPVNAADAAALEHDK	0.003	0.041	0.113
	D97	YNHADAEFQER	0.002	0.0214	0.031
	D220*	A[+42]AGGGAPMADNNEGADGVGSSSGNWHCDSTWLGDR	0.054	0.194	0.273
Methionine Oxidation	M204	RLNFGQTGDSESVPDPQPLGEPPAAPSGVGPNTMAAGGGAPMADNNEGADGVGSSSGNWHCDSTWLGDR	0.003	0.077	0.147
	M212	RLNFGQTGDSESVPDPQPLGEPPAAPSGVGPNTMAAGGGAPMADNNEGADGVGSSSGNWHCDSTWLGDR	0.002	0.094	0.171
	M212*	A[+42]AGGGAPMADNNEGADGVGSSSGNWHCDSTWLGDR	0.017	0.054	0.116
