# Supplementary material for: Comprehensive Forced Degradation Study Revealing Diverse Chemical and Physical Degradation Pathways of AAV8
Source: Research Square preprint supplement (doi:10.21203/rs.3.rs-7596388/v1), 2025-10-09
Supplement: Supplementary file 2 [file 82b07ed7b521eec81d22da1f.xlsx]

## Sheet: Supplemental Table 3
	Site	Peptide Sequence	pH Stress
			pH 7.3 (Control)	pH 9.0	pH 3.0
Asparagine Deamidation	N57	YLGPFNGLDK	0.219	0.377	0.166
	N94	YNHADAEFQER	0.04	0.049	0.018
	N263	QISNGTSGGATNDNTYFGYSTPWGYFDFNR	0.143	0.29	0.127
	N514	YHLNGR	0.055	0.065	0.051
	N540	FFPSNGILIFGK	0.025	0.033	0.023
Aspartic Acid Isomerization	D4	AADGYLPDWLEDNLSEGIR	0.028	0.016	0.085
	D220*	A[+42]AGGGAPMADNNEGADGVGSSSGNWHCDSTWLGDR	0.054	0.022	0.07
	D628	IPHTDGNFHPSPLMGGFGLK	0.025	0.022	0.031
