# Supplementary material for: Comprehensive Forced Degradation Study Revealing Diverse Chemical and Physical Degradation Pathways of AAV8
Source: Research Square preprint supplement (doi:10.21203/rs.3.rs-7596388/v1), 2025-10-09
Supplement: Supplementary file 3 [file ba2c491670119f7817de657e.xlsx]

## Sheet: Supplemental Table 1
	Site	Peptide Sequence	Oxidative stress
			Control	1ppm H2O2	1000ppm H2O2
Tryptophan Oxidation	W23	EWWALKPGAPKPK	<1.0%	<1.0%	0.04
Methionine Oxidation	M204	LNFGQTGDSESVPDPQPLGEPPAAPSGVGPNTMAAGGGAPMADNNEGADGVGSSSGNWHCDSTWLGDR	0.013	0.101	0.984
	M212	LNFGQTGDSESVPDPQPLGEPPAAPSGVGPNTMAAGGGAPMADNNEGADGVGSSSGNWHCDSTWLGDR	0.013	0.089	0.983
	M374	TIANNLTSTIQVFTDSEYQLPYVLGSAHQGCLPPFPADVFMIPQYGYLTLNNGSQAVGR	0.015	0.016	0.261
	M405	SSFYCLEYFPSQMLR	<1.0%	<1.0%	0.134
	M437	LMNPLIDQYLYYLSR	<1.0%	<1.0%	0.014
	M473	TQTTGGTANTQTLGFSQGGPNTMANQAK	<1.0%	<1.0%	0.037
	M526	NSLANPGIAMATHK	<1.0%	<1.0%	0.007
	M561	DNADYSDVMLTSEEEIK	<1.0%	<1.0%	0.93
	M637	IPHTDGNFHPSPLMGGFGLK	<1.0%	<1.0%	0.162
	M212*	A[+42]AGGGAPMADNNEGADGVGSSSGNWHCDSTWLGDR	<1.0%	0.053	0.989
